# Supplementary material for: Hydrothermal synthesis and photoluminescence properties of rare-earth niobate and tantalate nanophosphors
Source: Royal Society of Chemistry journal article supplement (doi:10.1039/c3dt50141h), 2013-01-01
Supplement: c3dt50141h.pdf [file c3dt50141h.pdf]

# Supporting Information

## Hydrothermal synthesis and photoluminescence properties of rare-earth niobates and tantalates nanophosphors

*Yanyan Du, Yuan Zhang, Keke Huang, Shan Wang, Long Yuan, Shouhua Feng\**

*State Key Laboratory of Inorganic Synthesis and Preparative Chemistry, College of Chemistry, Jilin  
University, Changchun, 130012, P.R. China*

*Corresponding author: Shouhua Feng; shfeng@mail.jlu.edu.cn*

*Tel: +86-431-85168661; Fax: +86-431-85168624.*

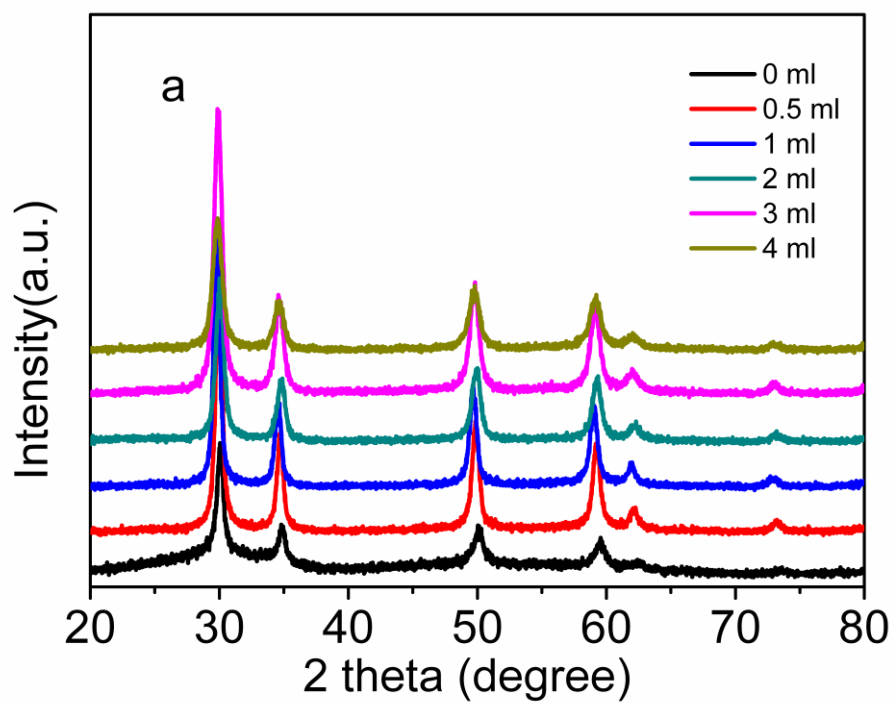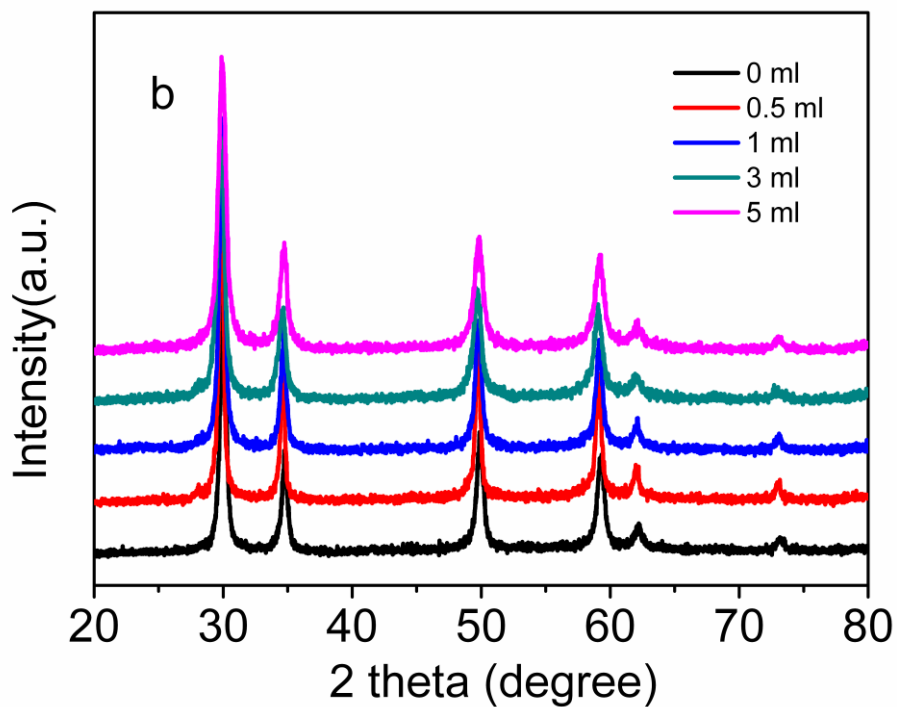

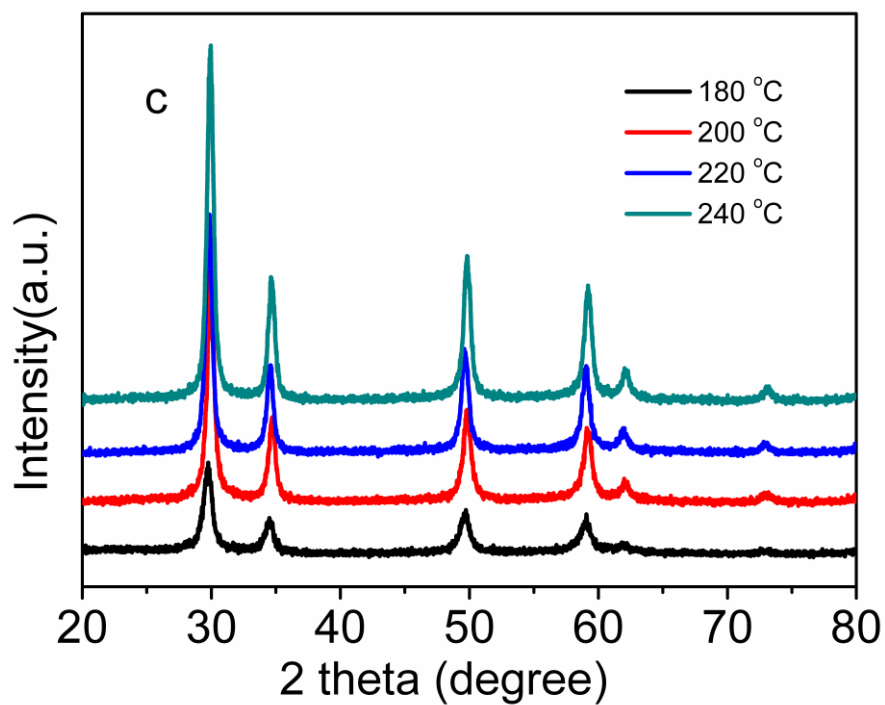

**Figure S1.** XRD patterns of Lu<sub>3</sub>TaO<sub>7</sub> nanophosphors synthesized in (a) different alkalinities (4 M KOH 0-4 mL), (b) different amounts of citric acid (0-5 mL) and (c) different temperatures (180-240 °C).

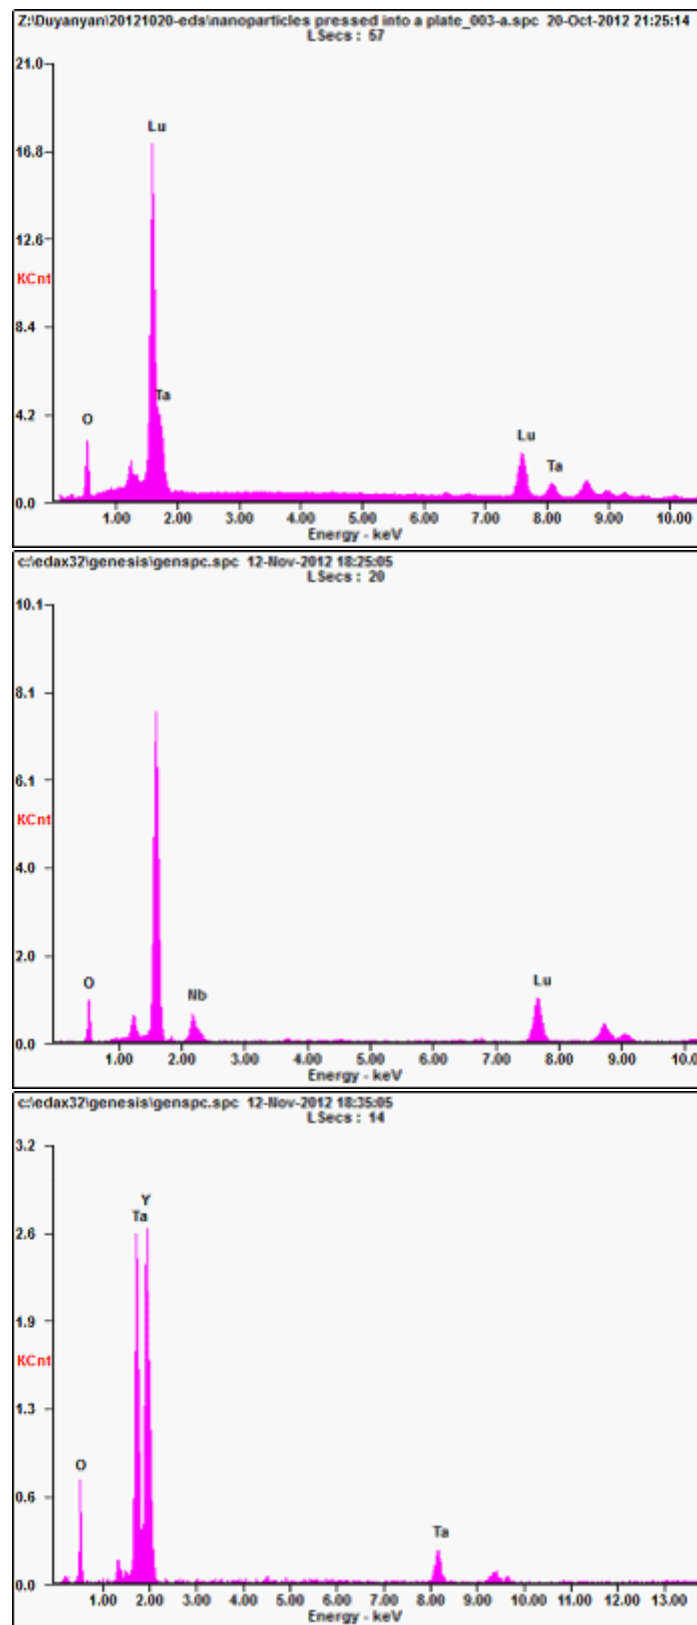

Figure S2. EDS spectra of Lu<sub>3</sub>TaO<sub>7</sub>, Lu<sub>3</sub>NbO<sub>7</sub> and Y<sub>3</sub>TaO<sub>7</sub> nanophosphors.
